# Supplementary material for: The Evaluation on the Cadmium Net Concentration for Soil Ecosystems
Source: MDPI journal article supplement (doi:10.3390/ijerph14030297), 2017-03-12

# Supplementary Materials: The Evaluation on the Cadmium Net Concentration for Soil Ecosystems

Yu Yao, Pei-Fang Wang\*, Chao Wang, Jun Hou and Ling-Zhan Miao

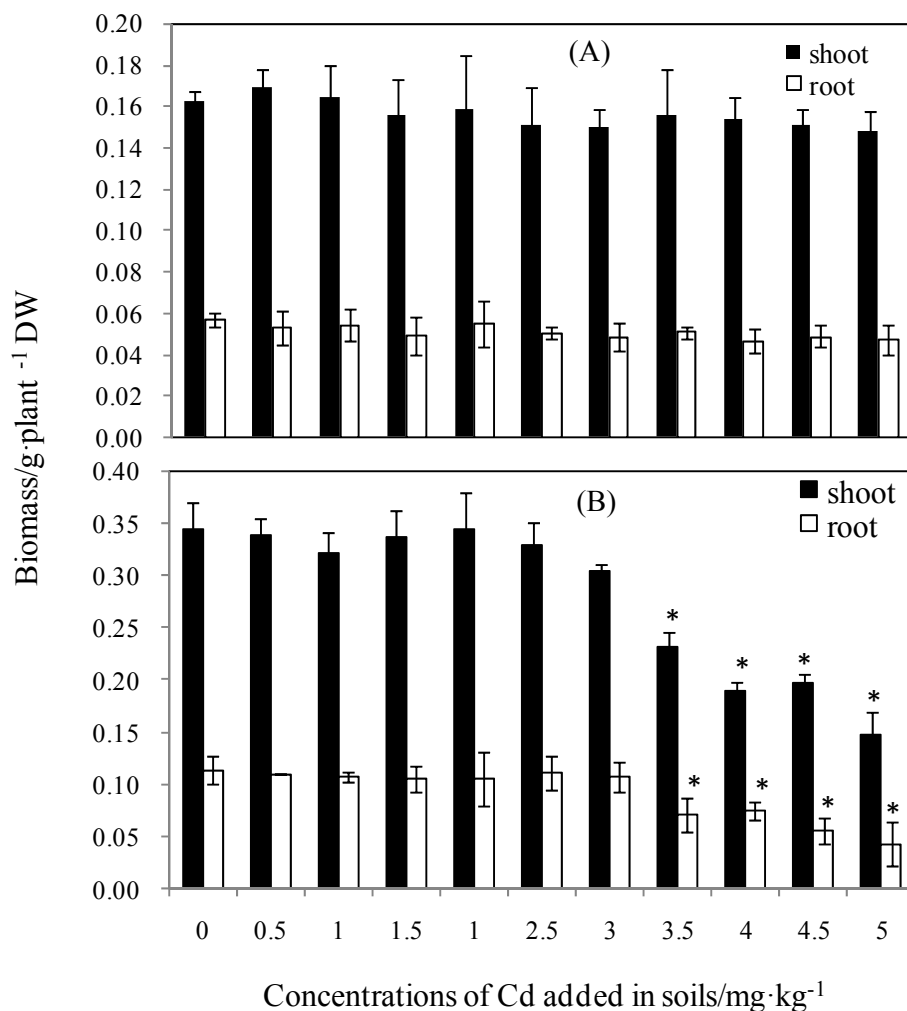

**Figure S1.** The biomass of wheat (A) and maize (B) grown in soils added with different levels of Cd. Each value is the mean  $\pm$  SD (standard deviation,  $n = 3$ ).

**Table S1.** Linear correlation coefficients ( $r$ ) between Cd concentrations in the plant tissues and bioavailable concentrations of Cd measured by eight methods in soils.

| Plant species | Plant tissues | $C_{DGT}^a$ | $C_{sol}^b$ | $HAc^c$  | EDTA     | NaAc     | $NH_4Ac$ | $MgCl_2^d$ | $CaCl_2$ |
|---------------|---------------|-------------|-------------|----------|----------|----------|----------|------------|----------|
| wheat         | shoot         | 0.985 **    | 0.969 **    | 0.946 ** | 0.970 ** | 0.939 ** | 0.936 ** | 0.968 **   | 0.937 ** |
|               | root          | 0.988 **    | 0.986 **    | 0.974 ** | 0.983 ** | 0.968 ** | 0.968 ** | 0.986 **   | 0.956 ** |
| maize         | shoot         | 0.994 **    | 0.997 **    | 0.984 ** | 0.995 ** | 0.982 ** | 0.930 ** | 0.985 **   | 0.981 ** |
|               | root          | 0.973 **    | 0.968 **    | 0.977 ** | 0.966 ** | 0.985 ** | 0.947 ** | 0.964 **   | 0.971 ** |

<sup>a</sup> $C_{DGT}$ : the DGT-measured concentration of Cd. <sup>b</sup> $C_{sol}$ : soil solution concentration of Cd. <sup>c</sup>HAc: the first step in the method of the European Community Bureau of Reference (BCR). <sup>d</sup> $MgCl_2$ : the first step in the five-step sequential extraction procedure by Tessier et al. (1979). \*\* Correlation is significant at the 0.01 level.

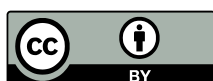

Supplement: s1 [file s1]
